# Supplementary material for: Prevalence of physical and mental health problems among internally displaced persons in White Nile state, Sudan 2023: a cross sectional study
Source: PubMed Central journal article supplement — BMC Public Health. 2024 Dec 18;24:3448. doi: 10.1186/s12889-024-20972-1 (PMC11654340; doi:10.1186/s12889-024-20972-1), 2024-12-18
Supplement: 12889_2024_20972_MOESM1_ESM.pdf [file 12889_2024_20972_MOESM1_ESM.pdf]

بِسْمِ اللَّهِ الرَّحْمَنِ الرَّحِيمِ

- We are a group of researchers conducting a study titled **Prevalence of physical and mental health problems among internally displaced persons in White Nile State, Sudan 2023**".
- This study is designed to explore aspects related to physical and mental health problems and displacement status.
- All Individual living in internally displaced camps in White Nile state are invited to participate in filling out questionnaires which will ask questions regarding the topic.
- Estimated time for filling the form is 20 minutes.
- Your Participation in this research is voluntary, and all information are anonymous and will only be used for research purposes.
- The participant can quit the research at any time. By agreeing to complete this form, you permit us to use the data in our research project.

1. What is your age?

- a) 0-5      b) 5-18      c) 18-24      d) 25-34      e) 35-44      f) 45-54      g) 55 and above

2. What is your gender?

- a) Male      b) Female

3. What is your marital status?

- a) Single      b) Married      c) Divorced      d) Widowed

4. What is your educational level?

- a) No formal education    b) Primary education    c) Secondary education    d) Vocational training    e) University degree or higher

5. What is your current occupation?

- a) Employed (full-time)      b) Employed (part-time)      c) Unemployed      d) Self-employed  
e) Student

6. How long have you been displaced due to the war?

- a) Less than 1 month      b) 1-3 months      c) 4-6 months      d) More than 6 months

## Major Depressive Episodes

|    |   |                                                                                                                                                                                                                                                                                     |              |               |    |     |
|----|---|-------------------------------------------------------------------------------------------------------------------------------------------------------------------------------------------------------------------------------------------------------------------------------------|--------------|---------------|----|-----|
| A1 | a | Were you ever depressed or down, or did you feel sad, empty or hopeless, most of the day, nearly every day, for two weeks?                                                                                                                                                          | No           | Yes           |    |     |
|    |   | IF NO, CODE NO TO <b>A1b</b> : IF <b>YES</b> ASK:                                                                                                                                                                                                                                   |              |               |    |     |
|    | b | For the past two weeks, were you depressed or down, or did you feel sad, empty or hopeless, most of the day, nearly every day?                                                                                                                                                      | No           | Yes           |    |     |
| A2 | a | Were you ever much less interested in most things or much less able to enjoy the things you used to enjoy most of the time, for two weeks?                                                                                                                                          | No           | Yes           |    |     |
|    |   | IF NO, CODE NO TO <b>A2b</b> : IF <b>YES</b> ASK:                                                                                                                                                                                                                                   |              |               |    |     |
|    | b | In the past two weeks, were you much less interested in most things or much less able to enjoy the things you used to enjoy, most of the time?                                                                                                                                      | No           | Yes           |    |     |
|    |   | IS <b>A1a</b> OR <b>A2a</b> CODED <b>YES</b> ?                                                                                                                                                                                                                                      |              |               |    |     |
| A3 |   | IF <b>A1b</b> OR <b>A2b</b> = <b>YES</b> : EXPLORE THE <b>CURRENT</b> AND THE MOST SYMPTOMATIC <b>PAST</b> EPISODE, OTHERWISE<br>IF <b>A1b</b> AND <b>A2b</b> = <b>NO</b> : EXPLORE <b>ONLY</b> THE MOST SYMPTOMATIC <b>PAST</b> EPISODE.                                           |              |               |    |     |
|    |   | <b>Over that two-week period, when you felt depressed or uninterested:</b>                                                                                                                                                                                                          | Past 2 Weeks | Past Episodes |    |     |
|    | a | Was your appetite decreased or increased nearly every day? Did your weight decrease or increase without trying intentionally (i.e., by $\pm 5\%$ of body weight or $\pm 8$ lb or $\pm 3.5$ kg, for a 160 lb/70 kg person in a month)?<br>IF <b>YES</b> TO EITHER, CODE <b>YES</b> . | No           | Yes           | No | Yes |
|    | b | Did you have trouble sleeping nearly every night (difficulty falling asleep, waking up in the middle of the night, early morning waking or sleeping excessively)?                                                                                                                   | No           | Yes           | No | Yes |
|    | c | Did you talk or move more slowly than normal or were you fidgety, restless or having trouble sitting still almost every day? Did anyone notice this?                                                                                                                                | No           | Yes           | No | Yes |
|    | d | Did you feel tired or without energy almost every day?                                                                                                                                                                                                                              | No           | Yes           | No | Yes |
|    | e | Did you feel worthless or guilty almost every day?                                                                                                                                                                                                                                  | No           | Yes           | No | Yes |
|    |   | IF <b>YES</b> , ASK FOR EXAMPLES.                                                                                                                                                                                                                                                   |              |               |    |     |

|    |                                                                                                                                                                                                                                     |     |     |    |     |
|----|-------------------------------------------------------------------------------------------------------------------------------------------------------------------------------------------------------------------------------------|-----|-----|----|-----|
|    |                                                                                                                                                                                                                                     | No  | Yes | No | Yes |
| f  | Did you have difficulty concentrating, thinking or making decisions almost every day?                                                                                                                                               |     |     |    |     |
| g  | Did you repeatedly think about death ( <b>FEAR OF DYING DOES NOT COUNT HERE</b> ) or have any thoughts of killing yourself, or have any intent or plan to kill yourself? Did you attempt suicide? If yes <b>TO EITHER, CODE YES</b> | No  | Yes | No | Yes |
| A4 | Did these symptoms cause significant distress or problems at home, at work, at school, socially, in your relationships, or in some other important way, and are they a change from your previous functioning?                       | No  | Yes | No | Yes |
| A5 | In between 2 episodes of depression, did you ever have an interval of at least 2 months, without any significant depression or any significant loss of interest?                                                                    | N/A |     | No | Yes |

A6 How many episodes of depression did you have in your lifetime? \_\_\_\_\_  
Between each episode there must be at least 2 months without any significant depression.

|                                 |                          |
|---------------------------------|--------------------------|
| NO                              | YES                      |
| <b>MAJOR DEPRESSIVE EPISODE</b> |                          |
| CURRENT                         | <input type="checkbox"/> |
| PAST                            | <input type="checkbox"/> |
| RECURRENT                       | <input type="checkbox"/> |

## POSTTRAUMATIC STRESS DISORDER

B1

B2 Have you ever experienced or witnessed or had to deal with an extremely traumatic event that included actual or threatened death or serious injury or sexual violence to you or someone else?

No Yes

B3 Starting after the traumatic event, did you repeatedly re-experience the event in an unwanted mentally distressing way, or did you have intense physical or psychological reactions when you were reminded about the event or exposed to a similar event?

No Yes

a *In the past month:*

b Did you persistently try to avoid thinking about or remembering distressing details or feelings related to the event?

No Yes

Did you persistently try to avoid people, conversations, places, situations, activities or things that bring back distressing recollections of the event?

B4 ARE 1 OR MORE H3 ANSWERS CODED YES? No Yes

*In the past month:*

No Yes

a Did you have trouble recalling some important part of the trauma? (but not because of or related to head trauma, alcohol or drugs).

No Yes

|   |                                                                                                         |    |     |
|---|---------------------------------------------------------------------------------------------------------|----|-----|
| b | Were you constantly and unreasonably negative about yourself or others or the world?                    | No | Yes |
| c |                                                                                                         |    |     |
| d | Did you constantly blame yourself or others in unreasonable ways for the trauma?                        | No | Yes |
|   | Were your feelings always negative (such as fear, horror, anger, guilt or shame)?                       | No | Yes |
| e | Have you become much less interested in participating in activities that were meaningful to you before? | No | Yes |
| f | Did you feel detached or estranged from others?                                                         | No | Yes |
| g | Were you unable to experience any good feelings (such as happiness, satisfaction or loving feelings)    | No | Yes |
|   | ARE 2 OR MORE <i>H4</i> ANSWERS CODED <i>YES</i> ?                                                      | No | Yes |

*In the past month:*

|    |                                                                                                 |    |     |
|----|-------------------------------------------------------------------------------------------------|----|-----|
| B5 |                                                                                                 |    |     |
| a  | Were you especially irritable or did you have outbursts of anger with little or no provocation? | No | Yes |
| b  | Were you more reckless or more self-destructive?                                                | No | Yes |
| c  | Were you more nervous or constantly on your guard?                                              | No | Yes |
| d  | Were you more easily startled?                                                                  | No | Yes |
| e  | Did you have more difficulty concentrating?                                                     | No | Yes |
| f  | Did you have more difficulty sleeping?                                                          | No | Yes |
|    | ARE 2 OR MORE <i>H5</i> ANSWERS CODED <i>YES</i> ?                                              | No | Yes |
| B6 | Did all these problems start after the traumatic event and last for more than one month?        | No | Yes |

|    |                                                                                                                                                                                                                   |    |     |
|----|-------------------------------------------------------------------------------------------------------------------------------------------------------------------------------------------------------------------|----|-----|
| B7 | During the past month, did these problems cause significant distress, or interfere with your ability to function at home, at work, at school or socially or in your relationships or in some other important way? | No | Yes |
|----|-------------------------------------------------------------------------------------------------------------------------------------------------------------------------------------------------------------------|----|-----|

AND IS "RULE OUT ORGANIC CAUSE (*O2 SUMMARY*)" CODED *YES*?

SPECIFY IF THE CONDITION IS ASSOCIATED WITH DEPERSONALIZATION, DEREALIZATION OR WITH DELAYED EXPRESSION.

|                                     |
|-------------------------------------|
| <b>GENERALIZED ANXIETY DISORDER</b> |
|-------------------------------------|

|                                                      |                          |
|------------------------------------------------------|--------------------------|
| NO                                                   | YES                      |
| <b>POSTTRAUMATIC<br/>STRESS DISORDER<br/>CURRENT</b> |                          |
| DEPERSONALIZATION                                    | <input type="checkbox"/> |
| DEREALIZATION                                        | <input type="checkbox"/> |
| DELAYED EXPRESSION                                   | <input type="checkbox"/> |

|    |   |                                                                                                                                                                                                                                                       |    |     |
|----|---|-------------------------------------------------------------------------------------------------------------------------------------------------------------------------------------------------------------------------------------------------------|----|-----|
| C1 | a | Were you excessively anxious or worried about several routine things, over the past 6 months? IN ENGLISH, IF THE PATIENT IS UNCLEAR ABOUT WHAT YOU MEAN, PROBE BY ASKING (Do others think that you are a worrier or a "worry wart"?) AND GET EXAMPLES | No | Yes |
|    | b | Are these anxieties and worries present most days?                                                                                                                                                                                                    | No | Yes |

ARE THE PATIENT'S ANXIETY AND WORRIES RESTRICTED EXCLUSIVELY TO, OR BETTER EXPLAINED BY, ANY DISORDER PRIOR TO THIS POINT? No Yes

C2 Do you find it difficult to control the worries? No Yes

C3 FOR THE FOLLOWING, CODE **NO** IF THE SYMPTOMS ARE CONFINED TO FEATURES OF ANY DISORDER EXPLORED PRIOR TO THIS POINT.

*When you were anxious over the past 6 months, did you, most of the time:*

a Feel restless, keyed up or on edge? No Yes

b Have muscle tension? No Yes

c Feel tired, weak or exhausted easily? No Yes

d Have difficulty concentrating or find your mind going blank? No Yes

e Feel irritable? No Yes

f Have difficulty sleeping (difficulty falling asleep, waking up in the middle of the night, early morning waking or sleeping excessively)? No Yes

ARE **3** OR MORE **N3** ANSWERS CODED **YES**?

C4 Do these anxieties and worries significantly disrupt your ability to work, to function socially or in your relationships or in other important areas of your life or cause you significant distress? No Yes

**AND** IS "RULE OUT ORGANIC CAUSE (**O2 SUMMARY**)" CODED **YES**?

|                                         |     |
|-----------------------------------------|-----|
| NO                                      | YES |
| <b>GENERALIZED ANXIETY<br/>DISORDER</b> |     |
| CURRENT                                 |     |

## Physical Health Questionnaire

1. How often have you had difficulty getting to sleep at night ?

1\_ Not at all    2\_ Rarely    3\_ Once in a while    4\_ Some of the time    5\_ Fairly often    6\_ Often    7\_ All of the time

2. How often have you woken up during the night?

1\_ Not at all    2\_ Rarely    3\_ Once in a while    4\_ Some of the time    5\_ Fairly often    6\_ Often    7\_ All of the time

3. How often have you had nightmares or disturbing dreams?

1\_ Not at all    2\_ Rarely    3\_ Once in a while    4\_ Some of the time    5\_ Fairly often    6\_ Often    7\_ All of the time

4. How often has your sleep been peaceful and undisturbed?

1\_ Not at all    2\_ Rarely    3\_ Once in a while    4\_ Some of the time    5\_ Fairly often    6\_ Often    7\_ All of the time

5. How often have you experienced headaches?

1\_ Not at all    2\_ Rarely    3\_ Once in a while    4\_ Some of the time    5\_ Fairly often    6\_ Often    7\_ All of the time

6. How often did you get a headache when there was a lot of pressure on you to get things done?

1\_ Not at all    2\_ Rarely    3\_ Once in a while    4\_ Some of the time    5\_ Fairly often    6\_ Often    7\_ All of the time

7. How often did you get a headache when you were frustrated because things were not going the way they should have or when you were annoyed at someone?

1\_ Not at all    2\_ Rarely    3\_ Once in a while    4\_ Some of the time    5\_ Fairly often    6\_ Often    7\_ All of the time

8. How often have you suffered from an upset stomach (indigestion)?

1\_ Not at all    2\_ Rarely    3\_ Once in a while    4\_ Some of the time    5\_ Fairly often    6\_ Often    7\_ All of the time

9. How often did you have to watch that you ate carefully to avoid stomach upsets?

1\_ Not at all    2\_ Rarely    3\_ Once in a while    4\_ Some of the time    5\_ Fairly often    6\_ Often    7\_ All of the time

10. How often did you feel nauseated ("sick to your stomach")?

1\_ Not at all    2\_ Rarely    3\_ Once in a while    4\_ Some of the time    5\_ Fairly often    6\_ Often    7\_ All of the time

11. How often were you constipated or did you suffer from diarrhea?

1\_ Not at all    2\_ Rarely    3\_ Once in a while    4\_ Some of the time    5\_ Fairly often    6\_ Often    7\_ All of the time

12. How many times have you had minor colds (that made you feel uncomfortable but didn't keep you sick in bed or make you miss work)?

1\_ 0 times    2\_ 1-2 times    3\_ 3 times    4\_ 4 times    5\_ 5 times    6\_ 6 times    7\_ 7+ times

13. How many times have you had respiratory infections more severe than minor colds that "laid you low" (such as bronchitis, sinusitis, etc.)?

1\_ 0 times    2\_ 1-2 times    3\_ 3 times    4\_ 4 times    5\_ 5 times    6\_ 6 times    7\_ 7+ times

14. When you had a bad cold or flu, how long did it typically last?

1\_ 1 day    2\_ 2 days    3\_ 3 days    4\_ 4 days    5\_ 5 days    6\_ 6 days    7\_ 7 days

# Malnutrition

## 1. Weight for Age:

- Is the child's weight appropriate for their age?
- If not, please rate the severity of the weight deficit.

## 2. Height for Age:

- Is the child's height appropriate for their age?
- If not, please rate the severity of the height deficit.

## 3. Weight for Height:

- Is the child's weight appropriate for their height?
- If not, please rate the severity of the weight deficit.

## 4. Edema:

- Does the child have visible swelling or edema in any body parts?
- If yes, please rate the severity of the edema.

## 5. Muscle Wasting:

- Does the child have visible muscle wasting or thinning?
- If yes, please rate the severity of muscle wasting.

## 6. Dietary Intake:

- How would you rate the child's overall dietary intake?
- 0 - Poor, 1 - Fair, 2 - Good, 3 - Excellent

## 7. Clinical Signs:

- Are there any other clinical signs of malnutrition observed in the child? (e.g., dry skin, brittle hair, delayed healing)
- If yes, please describe and rate the severity of the signs.

## 8. General Health Status:

- How would you rate the child's overall health status?
- 0 - Very Poor, 1 - Poor, 2 - Fair, 3 - Good, 4 - Excellent

## 9. Access to Healthcare:

- Does the child have access to regular healthcare services?
- If no, please describe the barriers to accessing healthcare.

## Additional Questions:

### 10. Breastfeeding:

- Is the child currently breastfed?
- If yes, please specify the frequency and duration of breastfeeding.

### 11. Complementary Feeding:

- Is the child receiving appropriate complementary feeding along with breastfeeding?
- If yes, please describe the types and frequency of complementary foods.

12. Food Security:

- How would you rate the household's food security status?
- 0 - Very Insecure, 1 - Insecure, 2 - Moderately Secure, 3 - Secure

13. Water and Sanitation:

- How would you rate the household's access to clean water and sanitation facilities?
- 0 - Very Poor, 1 - Poor, 2 - Fair, 3 - Good, 4 - Excellent

14. Socioeconomic Status:

- How would you rate the household's socioeconomic status?
- 0 - Very Poor, 1 - Poor, 2 - Average, 3 - Good, 4 - Excellent
